# Enhanced effective codon numbers to understand codon usage bias

Reginald Smith<sup>1</sup>

1 Supreme Vinegar LLC, Bensalem, PA 19020

✉Current Address: Supreme Vinegar LLC, 3430 Progress Dr., Suite D, Bensalem, PA 19020

\* [rsmith@supremevinegar.com](mailto:rsmith@supremevinegar.com)

## Abstract

Codon usage bias is a well recognized phenomenon but the relative influence of its major causes: G+C content, mutational biases, and selection, are often difficult to disentangle. This paper presents methods to calculate modified effective codon numbers that allow the investigation of the relative strength of each of these forces and how genes or organisms have their codon biases shaped. In particular, it demonstrates that variation in codon usage bias across organisms is likely driven more by mutational forces while the variation in codon usage bias within genomes is likely driven by selectional forces.

## Author summary

A new method of disaggregating codon bias influences (G+C content, mutational biases, and selection) is described where I show how that different values of the effective codon number, following Wright's  $N_e$ , can be used as ratios to demonstrate the similar or different causes of codon biases across genes or organisms. By calculating ratios of the different types of effective codon numbers, one can easily compare organisms or different genes while controlling for G+C content or relative mutational biases. The driving forces determining the variations in codon usage bias across or within organisms thus become much clearer.

## Introduction

From the decipherment of the genetic code [1] to early predictions of selection against supposedly neutral synonymous codons [2], the phenomenon of codon usage bias, the uneven usage of synonymous codons for amino acids [3, 4], has been found to be ubiquitous not only across different organisms but even across different genes within a genome with those more highly expressed genes most likely to have codon biases [5–9]. The current consensus is that codon bias is overwhelmingly driven by two joint processes: patterns of mutational bias which alter codons, particularly the G+C content at the position of the third nucleotide base, GC(3), and selection where specific codons are selected for due to advantages such as translation efficiency [9–12]. Codon usage bias can also be driven by genome wide G+C content where codons with higher G+C content are more prevalent in line with genome wide processes, such as the gBGC process in meiotic repair, that prefer G and C bases. Critical to the understanding of the underlying causes of codon usage bias has been the metrics used to define and

measure it. This paper will supplement the most commonly used metric, Wright's  $N_c$ , hereafter designated as  $N_c$ . First, we will briefly review the most common codon usage bias metrics and their particular advantages. Second, we will explain combinatorics using information theory and show how this can re-derive several  $N_c$  like quantities that represent the different effects of genome G+C content, mutational bias, and selection on codon usage bias. Finally, we will demonstrate the metrics' utilization both across a wide group of organisms and the genes of several organisms to demonstrate how to measure the relative effects of biased mutation and selection in shaping codon usage bias.

## 0.1 Measurements of codon usage bias

From the beginning, various numerical metrics have been proposed in order to understand codon usage bias. Early measures used the relative frequency of synonymous codons against a maximum frequency within the same group to calculate codon usage bias. Metrics such as the relative synonymous codon usage index (RSCU) [9] and the codon adaptation index (CAI) [13] measured the usage of synonymous codons against random or maximum frequency focusing on measuring the relative disparity within the code of each amino acid. Later, and probably most prominent, was the work of Wright [14] whose effective number of codons,  $N_c$ , used concepts of minimum homozygosity and the effective population size (considering each synonymous codon as an 'allele') to estimate codon usage bias.  $N_c$  is one of the most widely used metrics and most useful for shorter genes though its value can exceed the actual numbers of codons in use. It has a maximum of 61 (64 total codons minus 3 stop codons in the standard code) and a minimum of 20 (one codon per amino acid). There have been several adaptations and commentaries on  $N_c$  due to its values when amino acids are missing or exist only at low frequencies [15–18]. Similar to this paper, many codon usage measurements have also implemented information theoretic methods such as entropy in order to analyze codon usage bias. Amongst the first was Tavare and Song [19]. Zeeberg [20] calculated the information entropy in bits across synonymous codons and compared it to the G+C content in different codon positions across genes for the newly sequenced human and mouse genomes. Later, a new metric, synonymous codon usage order (SCUO) [21] also used information entropy but used the proportion of theoretical maximum entropy to create a metric demonstrating the relative diversity of codon usage from a value of 0 representing maximum diversity (random usage) up to 1 for extremely skewed codon usage. A measure of relative entropy [22] also was developed.

While many of these codon usage metrics have their own particular advantages such as easily interpretable values, dealing with extreme bias cases, etc. most works still demonstrate that the traditional  $N_c$  and its variants perform reasonably well in comparison [23,24]. Therefore, a technique that can use the power of information theory as well as the general utility of  $N_c$  can provide insight while combining the strengths of both.

## Materials and methods

### Combinatorics of codon bias

It is well known that for a nucleotide sequence of length  $L$ , there are at most,  $4^L$  possible different sequences using each nucleotide under the assumption they occur with equal frequency individually and relative to other nucleotides. Even for short sequences, the number of combinations soon becomes astronomical. However, such a sequence structure is essentially random which the sequences of living organisms are not [25].

A more constrained measure of the number of possible sequences that takes into account differing frequencies of occurrence uses the entropy function. Shannon and Weaver [26] showed that given any sequence of length  $L$  consisting of  $M$  distinct symbols, the entropy  $H$  is measured by

$$H = - \sum_{k=1}^M p_k \log_2 p_k \quad (1)$$

The number of possible sequences,  $N$ , is given by

$$N = 2^{HL} \quad (2)$$

The entropy function represents not the information contained in any given sequence per se but how much a reduction in uncertainty (information) the sequence conveys given the frequency of occurrence in its symbols. This is easily applied to the nucleotide sequence case. For the four nucleotides, the Eq. 2 is accurate given the entropy calculated by the frequency of each base. When all occur equally,  $H = 2$  and we get the original result  $4^L$ . A brief example of this technique is illustrative.

Assume that the base pairs G/C or A/T occur in equal combinations within a sequence. Therefore, the G+C content of the sequence can allow us to determine its entropy where

$$H = -2 \left( \left( \frac{p_{GC}}{2} \right) \log_2 \left( \frac{p_{GC}}{2} \right) + \left( \frac{1-p_{GC}}{2} \right) \log_2 \left( \frac{1-p_{GC}}{2} \right) \right) \quad (3)$$

Based on this we can see how the change in G+C content alone can drastically reduce the number of possible sequences. For a G+C content of 60%, a 100 bp sequence will have only 13% of the number of the number of possibilities as one where G+C is 50%. At 1 kbp, it will be approximately  $10^{-9}$  times as many as in the random case. While these are huge reductions, they still leave a large number of sequences possible.

One of the key questions in codon usage bias is the relative importance of factors such as G+C content, biased mutation rates, and selection in determining the usage pattern of synonymous codons. All factors play a part though it is well known that codon usage bias tends to correlate with levels of gene expression given different synonymous codons confer efficiency to the protein translation process. While it can be difficult to analyze each of these factors separately, one approach is to compare measures of codon bias in actual data with their expected values if only one or two of these factors alone skewed synonymous codon usage.

Using  $N_c$  as our measurement of codon bias, we can derive alternate versions of  $N_c$  which are due to primarily genome wide, mutational, and selection processes. By comparing these to each other as well as the traditional definition of  $N_c$  we can illuminate for individual organisms or even large groups of related organisms, how various processes shape codon usage bias.

## 1 Alternative measures of $N_c$

We will define four types of additional  $N_c$  as detailed in Table 1. All definitions will include only sense codons and exclude the three stop codons in the standard code. The first,  $N_c(0)$  is the maximum value of  $N_c$  which is 61. This is the base maximum value and the starting point for all comparisons. Second, we will define  $N_c(1)$  which is the expected value of  $N_c$  if only genome wide processes that determine overall G+C content are the sole forces shaping codon usage. Codons are used at random with preference towards combinations that equal the G+C content of the overall genome.

**Table 1. Variations of effective codon number.**

| $N_c(N)$ | Effective level of organization   | Causes of reduction in $N_c(N)$                                                                                                                                      |
|----------|-----------------------------------|----------------------------------------------------------------------------------------------------------------------------------------------------------------------|
| $N_c(0)$ | Base random case                  | All synonymous sense codons are equally probable; base random case                                                                                                   |
| $N_c(1)$ | Genome wide processes             | Forces that determine genome-wide overall G+C content; all synonymous codons with the same G+C content treated as equivalent.                                        |
| $N_c(2)$ | G+C preference in codon positions | Mutational or selection biases for or against G+C within codons. All synonymous codons with G or C in the same positions treated as equivalent and equally probable. |
| $N_c(3)$ | Preference for specific codons    | Selection or drift forces that emphasize specific codon usage where actual codon probabilities determine likelihood.                                                 |
| $N_c$    | Wright's $N_c$                    | Effective codon number based on probabilities of synonymous codons across amino acids. $N_c$ and $N_c(3)$ are approximately equal numerically in most situations.    |

Definitions of various effective codon sizes used in the paper.

Third, will be  $N_c(2)$  which is based on the relative G+C contents at each of the three base positions in the codons. This measure reflects the effects of mutational biases that drive preference to codons that match the preponderance or lack of G+C bias for each codon position, especially GC(3). While this measure will not exclude selection processes, it only accounts for selection that acts on all synonymous codons equally if they have G+C in the same positions in the codons. The final measure,  $N_c(3)$ , which will be shown to very closely approximate  $N_c$ , incorporates all other processes that drive codon usage bias. Given the first two measures incorporated genome G+C content and mutational bias,  $N_c(3)$  reflects these as well as selection processes that select for specific codons and probably overwhelmingly reflect the effects of selection.

By comparing these measures in different organisms or even across taxonomy groups, a clear picture of the relative drivers of codon usage bias can be demonstrated as well as outliers that rely almost exclusively on genome, mutational, or selection factors for their distribution of codon usage.

### 1.1 Calculating $N_c(1)$

In order to create a value of the effective number of codons that reflects only genome wide G+C content we assume that the distribution of codons overall is such that their weighted frequency by G+C content equals the genome G+C content. Codons come in four classifications of G+C content where a codon can have zero, one, two, or three G+C nucleotides. Under the model of random usage, except for G+C content, each synonymous codon has an equal probability of selection if it has the same G+C content as another synonymous codon. Likewise, A+T rich synonymous codons are relatively less/more frequent for G+C rich/poor genes or genomes.

To calculate the distribution of codons by G+C content, we will use the assumption of a maximum entropy distribution in the frequency of the four codon classes subject to the constraints of their weighted average meeting the G+C content of the genome. Maximum entropy has been used in the past to measure the effect of G+C bias on codon usage [27] but here we will use the maximum entropy distribution to derive a form of the effective codon number rather than a regression analysis.

Assume the probability a codon with a G+C content of  $n$  is represented by  $p_n$  and the overall gene or genome content is  $p_{GC}$ . We thus need to calculate a maximum

entropy distribution amongst  $p_0$ ,  $p_1$ ,  $p_2$ , and  $p_3$  subject to the constraints

133

$$p_{GC} = \sum_{k=0}^3 k p_k = p_1 + 2p_2 + 3p_3 \quad (4)$$

$$\sum_{k=0}^3 p_k = p_0 + p_1 + p_2 + p_3 = 1 \quad (5)$$

The method of analytically deriving the maximum entropy distribution with the technique of Lagrange multipliers is well studied [28] but for purposes of brevity, this problem reduces to one where it is essential to numerically solve the real root of the order three polynomial

134

135

136

137

$$x^3(1 - p_{GC}) + x^2(2/3 - p_{GC}) + x(1/3 - p_{GC}) - p_{GC} = 0 \quad (6)$$

In the equation above  $x = 2^{-\lambda/3}$  where  $\lambda$  is the Lagrange multiplier. Once solved, the individual  $p_n$  can be calculated.

138

139

$$p_n = 2^{-\alpha} 2^{-n\lambda/3} \quad (7)$$

The constant  $\alpha = \log_2(1 + 2^{-\lambda/3} + 2^{-2\lambda/3} + 2^{-\lambda})$

140

Once we solve for the  $p_n$  we can first estimate the relative proportion of synonymous codons based on their G+C values. For example, in the standard code leucine uses codons TTA, TTG, CTT, CTC, CTA, and CTG. These can be arranged into  $p_0$  (TTA),  $p_1$  (TTG, CTT, CTA) and  $p_2$  (CTC, CTG) codons. For G+C of 50% all would be used equally but where G+C is 65% the values are  $p_0 = 0.13$ ,  $p_1 = 0.19$ ,  $p_2 = 0.28$ , and  $p_3 = 0.40$ . These probabilities are equally divided amongst the codons in the group where codons with 0 or 3 G+C bases have 8 combinations while those with one or two have 24 combinations. Therefore the probability of each codon with 0,1, or 2 G+C bases is 0.016, 0.008, and 0.011. The total probabilities of all six codons for leucine is  $0.016 + 3 \times 0.008 + 2 \times 0.011 = 0.0634$  and divide the probability of each to get the probability of each codon representing leucine to be TTA (25%), TTG/CTT/CTA each 13% and CTC or CTG 18%.

141

142

143

144

145

146

147

148

149

150

151

152

Further, we can calculate  $N_c(1)$  based on the methodology of Eq. 2. Calculating  $H_{max}$  as the entropy of the distribution of  $p_n$

153

154

$$H_{max} = - \sum_{i=0}^3 p_i \log_2 p_i \quad (8)$$

The expected number of codons per G+C type is  $2^{H_{max}}$  and though the actual amount can vary due to G+C requirements, this is the expected value. Next we multiply this by the expected number of codons per category of 16. In reality those codons with G+C of zero or three only have 8 combinations while those of G+C of one or two have 24 but the expected value is still 16.  $N_c(1)$  is then defined as

155

156

157

158

159

$$N_c(1) = 16 \times 2^{H_{max}} - 3 = 2^{4+H_{max}} - 3 \quad (9)$$

The subtraction of three at the end is to remove the three stop codons in the standard code that are inherent in the assumptions of the calculation of  $N_c(1)$ . If all codons are equally likely despite G+C content where G+C=50%,  $H_{max} = 2$  and  $N_c(1) = 61$ . This value is the expected value of  $N_c$  for random codon usage accounting for genome, or gene, G+C content. The value of  $N_c(1)$  is usually not very different from the maximum value of 61 across the common G+C content range of most genes or genomes but as the G+C content becomes increasingly skewed,  $N_c(1)$  rapidly decreases.

160

161

162

163

164

165

166

**Table 2.**  $N_c(1)$  for various levels of genome G+C content.

| G+C content values | $N_c(1)$ |
|--------------------|----------|
| 10% / 90%          | 29.2     |
| 20% / 80%          | 42       |
| 30% / 70%          | 52.1     |
| 40% / 60%          | 58.7     |
| 50%                | 61       |

Expected values of  $N_c(1)$  for various values of G+C content.

$N_c(1)$  is also symmetric having the same value for genomes of the same G+C or A+T content. Table 2 and Fig 1 demonstrate values of  $N_c(1)$  and their trends based on G+C content. It seems for a lower bound of  $N_c(1)$  being 20, the minimum and maximum possible G+C content is less than 10% and greater than 90% but due to uneven ratios of G+C across synonymous codons for each amino acid, the bounds are much higher/lower in practice.

A close approximation of  $N_c(1)$  is given by the equation below, with the variable as the decimal of the G+C content in range [0, 1]

$$N_c(1) \approx 11 + 200GC(1 - GC) \quad (10)$$

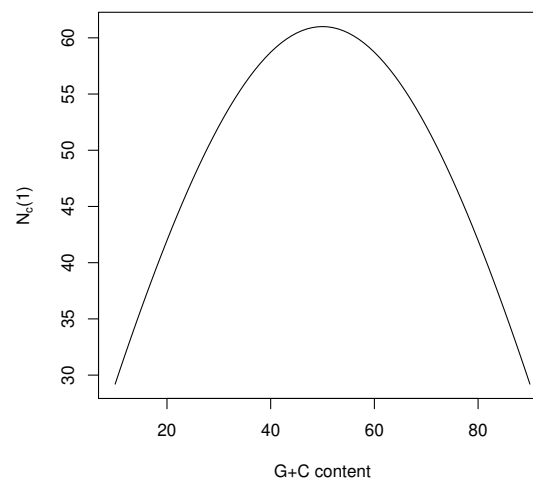

**Fig 1.** Plot of the expected value of  $N_c(1)$  based on genome G+C content.

## 1.2 Calculating $N_c(2)$

Following the calculation of  $N_c(1)$  which takes genome wide processes into account, the next level of detail comes from G+C content at the three individual positions within codons which affects codon usage and distribution [29]. The position G+C content, especially GC(3), is often driven by mutational biases in favor of G+C [14,30–32] and thus can be seen as a good indicator of the relative influence of such forces on codon usage patterns. To calculate  $N_c(2)$  we will take a simpler route than with  $N_c(1)$  while retaining some assumptions.

The entropy content of a single codon position is defined amongst the four nucleotides assuming that synonymous codons with G+C in the same positions will be represented with equal frequency. The entropy at any of the three codon positions  $GC(N)$  can be stated

$$H_{GC(N)} = -2 \left( \left( \frac{p_{GC(N)}}{2} \right) \log_2 \left( \frac{p_{GC(N)}}{2} \right) + \left( \frac{1 - p_{GC(N)}}{2} \right) \log_2 \left( \frac{1 - p_{GC(N)}}{2} \right) \right) \quad (11)$$

There is a maximum of four if  $GC(N) = 50\%$ . The total value of  $N_c(2)$  is determined by taking the product of combinations at each three position and removing the three stop codons.

$$N_c(2) = 2^{H_{GC(1)}} 2^{H_{GC(2)}} 2^{H_{GC(3)}} - 3 = 2^{H_{GC(1)} + H_{GC(2)} + H_{GC(3)}} - 3 \quad (12)$$

Again the maximum value if  $GC(1) = GC(2) = GC(3) = 50\%$  is  $N_c(2) = 61$ . Because the average of all three positions must equal the total G+C value, the sum of the entropies cannot exceed  $4 + H_{max}$  and the value of  $N_c(2) \leq N_c(1)$ . Given the forces that determine G+C content at each position are largely mutational,  $N_c(2)$  is a reflection on the effective number of codons given both G+C content within the genome and mutational forces shaping the G+C content within codons. It does not categorically exclude selection, however, the selection it accounts for are selective forces that only select for/against codons based on the G+C positioning within a codon. Different synonymous codons with G+C at the same positions are considered selectively neutral in terms of  $N_c(2)$ . The value of  $N_c(2)$  is often substantially lower than  $N_c(1)$  and is the first reflection of evolutionary forces reducing the effective number of codons towards the value of  $N_c$ . The fraction  $N_c(2)/N_c(1)$  is a way to normalize the decrease in effective codon size due to mutational forces independent of G+C content to compare the relative strength of mutation in determining codon bias across genes or organisms.

### 1.3 Calculating $N_c(3)$ and comparison to $N_c$

The final measure of  $N_c$  closely approximates the value of  $N_c$ . The value  $N_c(3)$  takes into account all aspects of codon usage distribution by being calculated from the total entropy of all sense codons (61 for the standard code though more for others). Accounting for codon usage at the level of the individual codon accounts for almost all information in codon usage bias and is why this closely approximates the traditional  $N_c$  value. The sense codon entropy,  $H_c$  for the standard code (NCBI codon table 1) is calculated as

$$H_c = - \sum_{i=1}^{61} p_i \log_2 p_i \quad (13)$$

The frequency of the  $i$ th codon is represented by  $p_i$ . Finally we have

$$N_c(3) = 2^{H_c} \quad (14)$$

The method of obtaining the effective number of codons is similar to the method of Jost [34] in calculating the effective number of species based on the diversity of species in an area. Subtracting the three stop codons is unnecessary since only the sense codons are accounted for in the calculation. The correspondence between  $N_c(3)$  and Wright's  $N_c$  is shown graphically in Fig 2 for a variety of different organisms and Fig 3 for the genes of *Acetobacter pasteurianus*.



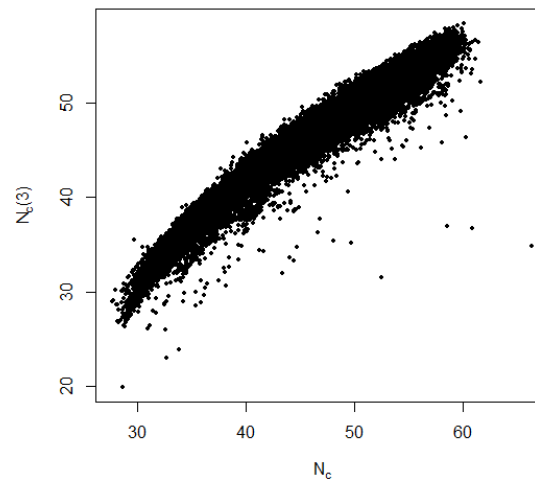

**Fig 2.** Scatterplot of  $N_c(3)$  versus  $N_c$  for  $N = 48,650$  genomes.  $R^2 = 0.94$ . CDS data obtained from HIVE-CUT RefSeq CDS [33]

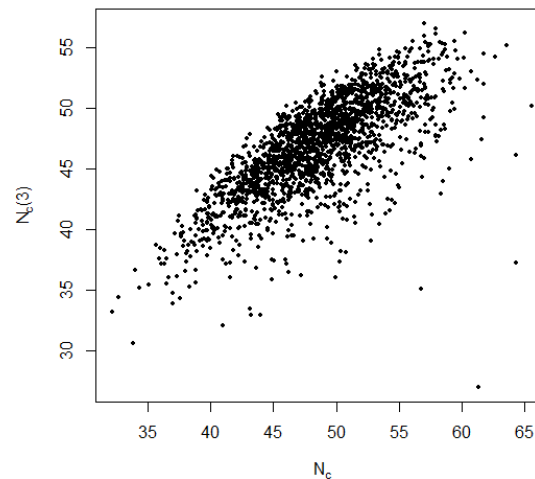

**Fig 3.** Scatterplot of  $N_c(3)$  versus Wright's  $N_c$  for all CDS with at least 200 amino acids for *Acetobacter pasteurianus*, RefSeq genome GCF 000723785.2.  $N = 1,905$  and  $R^2 = 0.53$

There is a close correspondence which is roughly linear at a  $R^2 = 0.94$  in Fig 2. 219  
There are some deviations though, typically when a small group of codons have an 220  
extremely high frequency as in some viruses or simple eukaryotes,  $N_c(3)$  can 221  
underestimate  $N_c$ .  $N_c(3)$  accounts for the balance of forces affecting codon usage bias, 222  
most prominently selection or drift which lead to specific synonymous codons being 223  
preferred for factors beyond the G+C content overall or mutational biases. In addition, 224  
it has the ease of calculation without the necessity of partitioning codons by amino acid 225  
as in calculating  $N_c$  and other codon usage metrics. 226



Like  $N_c(2)/N_c(1)$  reflected the normalized codon bias due to mutational effects,  $N_c(3)/N_c(2)$  demonstrates the overall codon bias due to codon specific effects by selection or drift that establish preferred codons. The comparison of the two can help understand how different forces shape codon usage bias.

### 1.3.1 $N_c(2)$ reflects primarily mutational biases

To support the thesis that  $N_c(2)$  is primarily reflective of mutational biases and not selection of individual codons, there are two major details. First,  $N_c(2)$  reflects primarily the effects of the GC(3) content. As predicted in [14], codon usage bias caused largely by patterns in synonymous mutation would be reflected in a relationship between  $N_c$  and GC(3) which was approximated as

$$N_c \approx 2 + GC(3) + \frac{29}{GC(3)^2 + (1 - GC(3))^2} \quad (15)$$

In this equation, GC(3) is represented in the range [0, 1]. Plots of  $N_c$  versus GC(3) are known as  $N_c$  plots where the curve in Eq. 15 is shown versus plots of data for different genes or organisms. In Fig 4  $N_c$  plots using  $N_c(2)$  and  $N_c(3)$  are shown. It is clear  $N_c(2)$  closely matches the theoretical curve while  $N_c(3)$  is below the curve as is expected when selection lowers the effective number of codons from that bias due only to mutation.

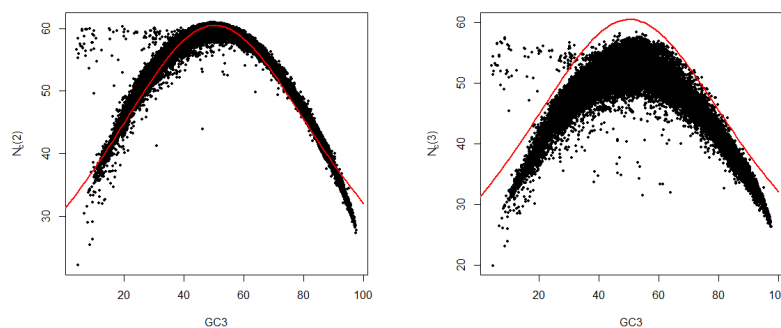

**Fig 4.**  $N_c$  plots of  $N_c(2)$  and  $N_c(3)$  for  $N = 48,650$  organisms from the HIVE-CUT RefSeq database The red line indicates the theoretical value from Eq. 15.

To test the assumption that selective codon usage and not G+C bias at any of the three codon positions drove the value of  $N_c(3)$ , a numerical simulation was performed across values of G+C from 40% to 75% at steps of 5%. At each GC content, different values of GC(1), GC(2), and GC(3) were simulated ranging from minimum values of GC minus 20% to maximum values of GC plus 20% at each position in steps of 5% as well. From these 10,000 binary codons (with G or C giving '1' and A or T giving '0') were created to model the codon bias. The frequency of each binary codon was divided by eight to account for all possibilities and  $H_c$  and  $N_c(3)$  were calculated. As shown in Fig 5, where the line is the average of  $N_c(3)/N_c(2)$  and the error bars show the minimum and maximum values, the values of  $N_c(3)$  are usually exactly identical to  $N_c(2)$  when only the GC(1), GC(2), and GC(3) site contents are considered. Therefore values of  $N_c(3)$  substantially lower than  $N_c(2)$  are almost surely indicative of selective usage of specific codons.

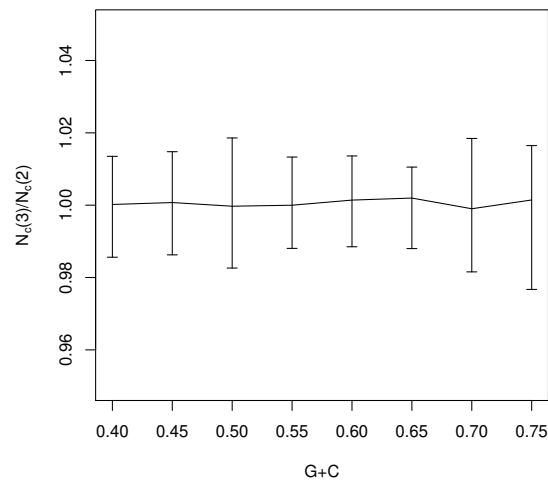

**Fig 5.** Plot of the average simulated ratio  $N_c(3)/N_c(2)$  across multiple values of G+C. Line is the average ratio of the two values while the error bars show the minimum and maximum ratios for each G+C group.

#### 1.4 Entropy bias and sample size

One drawback of using information theoretic measures is that measures based on entropy can show a significant and systematic underestimation bias at low sample sizes [35–37]. In short, when measuring entropy with for  $M$  non-zero categories (probabilities) for  $N$  data points, the correction for the underestimation bias is given by

$$\hat{H} = H_{est} + \frac{M + 1}{2N} \quad (16)$$

Therefore, one must be cautious in interpreting the validity of measures, especially  $N_c(3)$  which has a  $M$  of 61, over relatively short sequences. Since the above is a known bias and not an error, one can add it to entropy as a correction but minimizing it as much as possible is preferable.

## Results

### 1.5 Using $N_c(1)$ , $N_c(2)$ , and $N_c(3)$ to understand codon usage bias across organisms

The absolute and relative values amongst the different types of  $N_c$  can be applied to individual or groups of organisms to investigate factors causing codon usage bias. Using the HIVE-CUT codon usage database [33], codon usage for the CDS from sequenced organisms in RefSeq was analyzed to calculate the various types of  $N_c$ . Differing from HIVE-CUT,  $N_c$  was calculated without including stop codons. Only one sequence per taxon ID was used in order to minimize sample bias due to organisms with large numbers of sequences, particularly pathogenic bacteria. In addition, virus betasatellite partial sequences were removed. First using the example of absolute values, eight distinct organisms are compared with all values of  $N_c$  in Fig 6. The top of each plot shows the G+C content above the decreasing values of  $N_c$ .

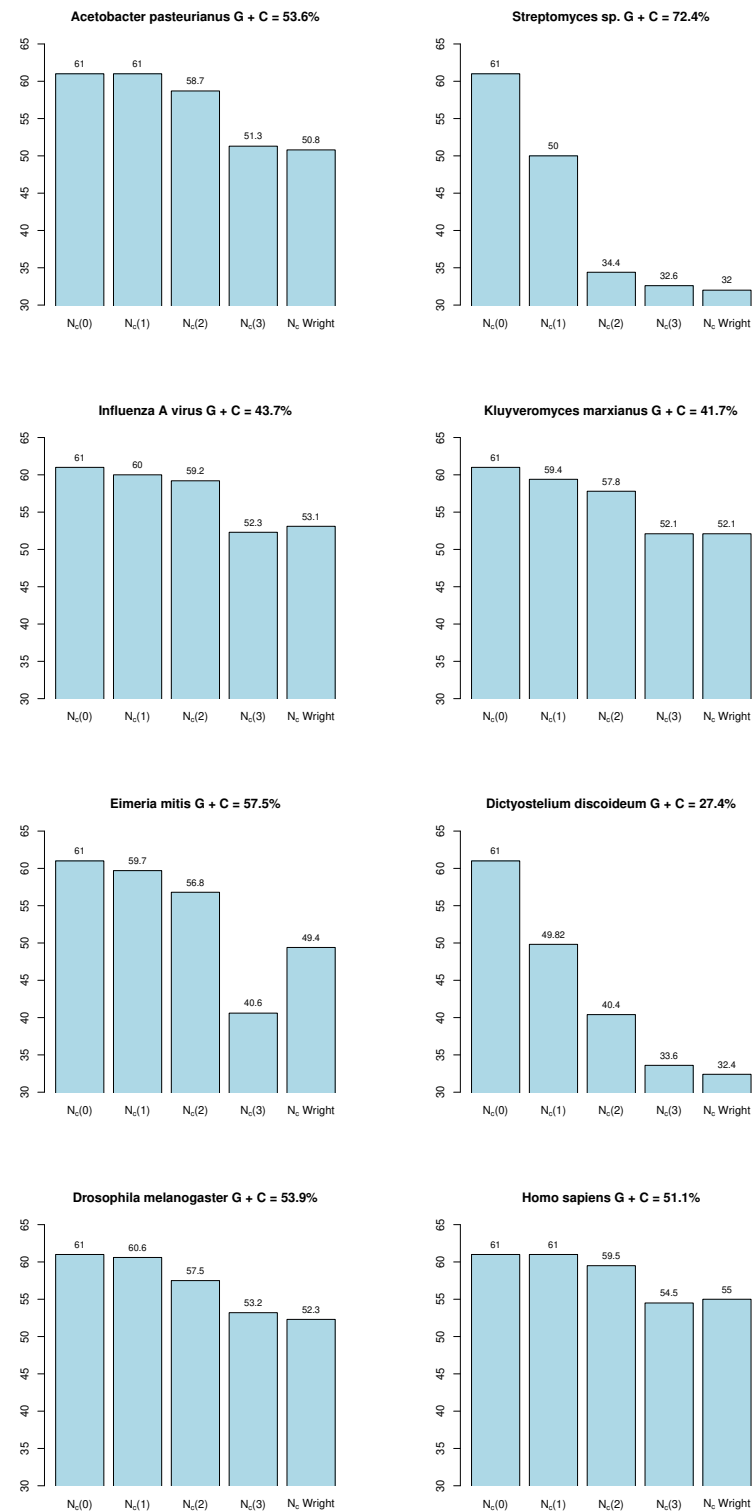

**Fig 6.** Comparisons of the various effective codon sizes for eight different organisms based on all CDS: *Acetobacter pasteurianus* (Alphaproteobacteria; vinegar fermenting bacterium), *Streptomyces CNT-302* (Actinobacteria), Influenza A (virus), *Kluyveromyces marxianus* (lactose fermenting yeast), *Eimeria mitis* (parasitic protozoan in chickens), *Dictyostelium discoideum* (slime mold), *Drosophila melanogaster* (fruit fly), and *Homo sapiens*.

| Organism                        | $N_c(2)/N_c(1)$ | $N_c(3)/N_c(2)$ |
|---------------------------------|-----------------|-----------------|
| <i>Acetobacter pasteurianus</i> | 0.97            | 0.87            |
| <i>Streptomyces CNT-302</i>     | 0.68            | 0.94            |
| Influenza A                     | 0.99            | 0.88            |
| <i>Kluyveromyces marxianus</i>  | 0.97            | 0.9             |
| <i>Eimeria mitis</i>            | 0.95            | 0.71            |
| <i>Dictyostelium discoideum</i> | 0.81            | 0.83            |
| <i>Drosophila melanogaster</i>  | 0.95            | 0.93            |
| <i>Homo sapiens</i>             | 0.98            | 0.92            |

**Table 3.** Values of  $N_c(2)/N_c(1)$  and  $N_c(3)/N_c(2)$  for the eight organisms.

Different organisms show relatively different factors influencing their codon bias. For example, in human genomes overall mutation seems to have relatively little effect reducing the effective codon usage only by one from the maximum.  $N_c(3)$  and  $N_c(2)$  however show a marked decrease to the values of about 55 suggesting selection likely plays a larger, though overall modest, part compared to mutation. More extreme examples are often seen in unicellular organisms and viruses. *Streptomyces* has a large drop from  $N_c(1)$  of 50 to a  $N_c(2)$  of 34. The difference between  $N_c(2)$  and  $N_c(3)$  is more moderate down to 32 indicating mutational biases likely drive most of the codon bias, a conclusion identical to that in [38]. An opposite story seems to be the case for the chicken protozoan parasite *Eimeria mitis*. Its  $N_c(2)$  of 57 decreases to 41 for  $N_c(3)$ . However, much of its codon bias is driven by three codons: CAG, AGC, and CGA which collectively account for 28% of all CDS codons and this likely lowers the  $N_c(3)$  substantially compared to the  $N_c$  of 49 though this is still a substantial reduction. It is likely these few codons and others are prominent largely by selection processes.

More informative than absolute numbers are the relative ratios  $N_c(2)/N_c(1)$  and  $N_c(3)/N_c(2)$ . These two ratios normalize the relative difference between effective codon sizes across different organisms in a way absolute numbers cannot. Therefore we can compare individual organisms or even look at wide groups using the first ratio as a measure of the reduction of codon size due to mutational biases while the second is a reduction largely due to specific codon selection pressures.

In Table 3 the organisms from Fig 6 have their ratios listed. Most insightful, however, is a plot of  $N_c(3)/N_c(2)$  vs.  $N_c(2)/N_c(1)$  for large groups of related organisms. These allow us to see across a wide span of organisms, how patterns of mutational or selection forces shaping codon bias occur. In the plots of Figs. 7, 8, 9, 10, and 11, this is shown for phyla across Bacteria, Archaea, several categories of viruses, the phylum of Chordata, various invertebrate phyla and for various mitochondrial and plant chloroplast sequences.

The overall patterns range from the relatively consistent and high ratios for vertebrates to the wide variations of unicellular organisms and mitochondria. In particular, Archaea and Bacteria tend to show a relatively restricted variation in codon bias due to selection but wide variation due to mutational processes with mutational biases with many types of bacteria having relatively high  $N_c(3)/N_c(2)$  near one but with much lower  $N_c(2)/N_c(1)$  demonstrating the effects of pressures on G+C content in codon positions. Viruses have the widest diversity with either or both mutation and selection playing a large part across many different viruses. While individual organisms may show stronger selection, on balance, selection only seems consistently significantly stronger than mutation in vertebrate mitochondria.

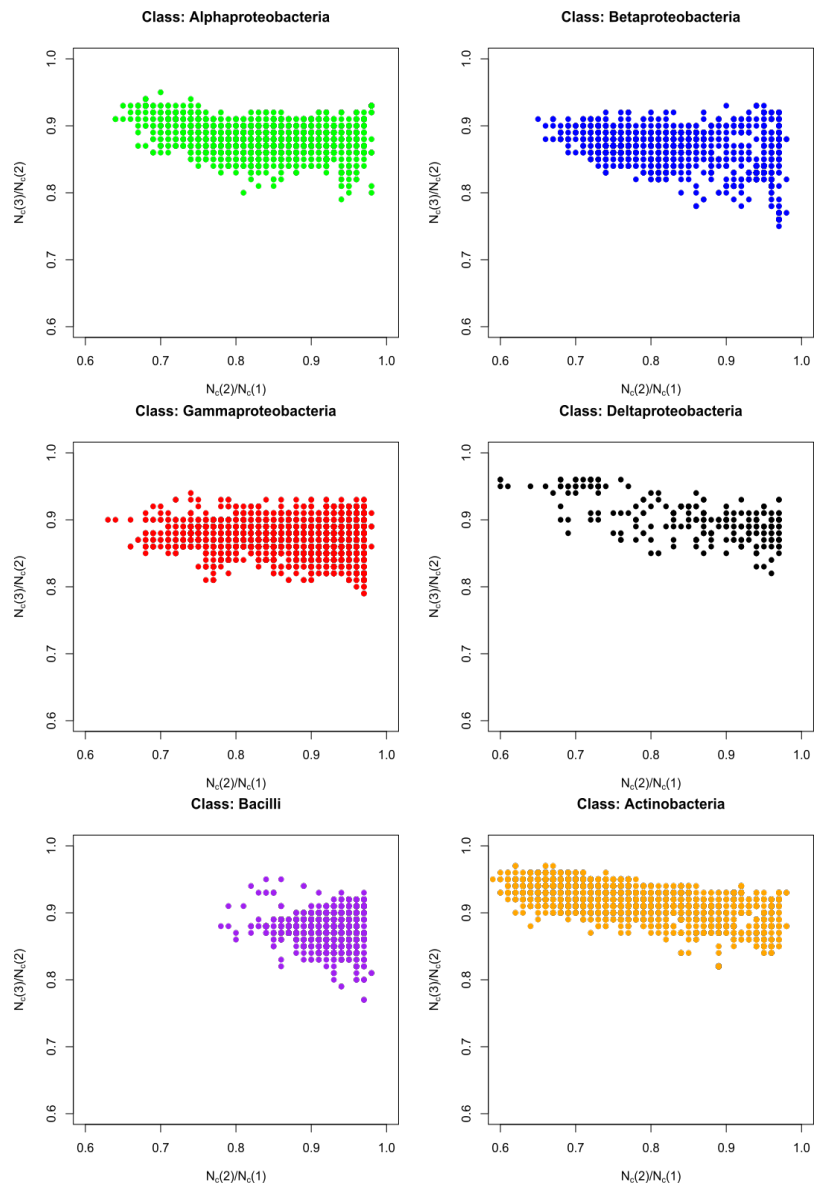

**Fig 7.** Ratios  $N_c(2)/N_c(1)$  and  $N_c(3)/N_c(2)$  across the bacteria classes of Alphaproteobacteria ( $N = 3, 293$ ), Betaproteobacteria ( $N = 2, 114$ ), Gammaproteobacteria ( $N = 11, 437$ ), Deltaproteobacteria ( $N = 235$ ), Bacilli ( $N = 9, 646$ ), and Actinobacteria ( $N = 6, 380$ ).  $N$  designates the number of distinct taxon IDs.

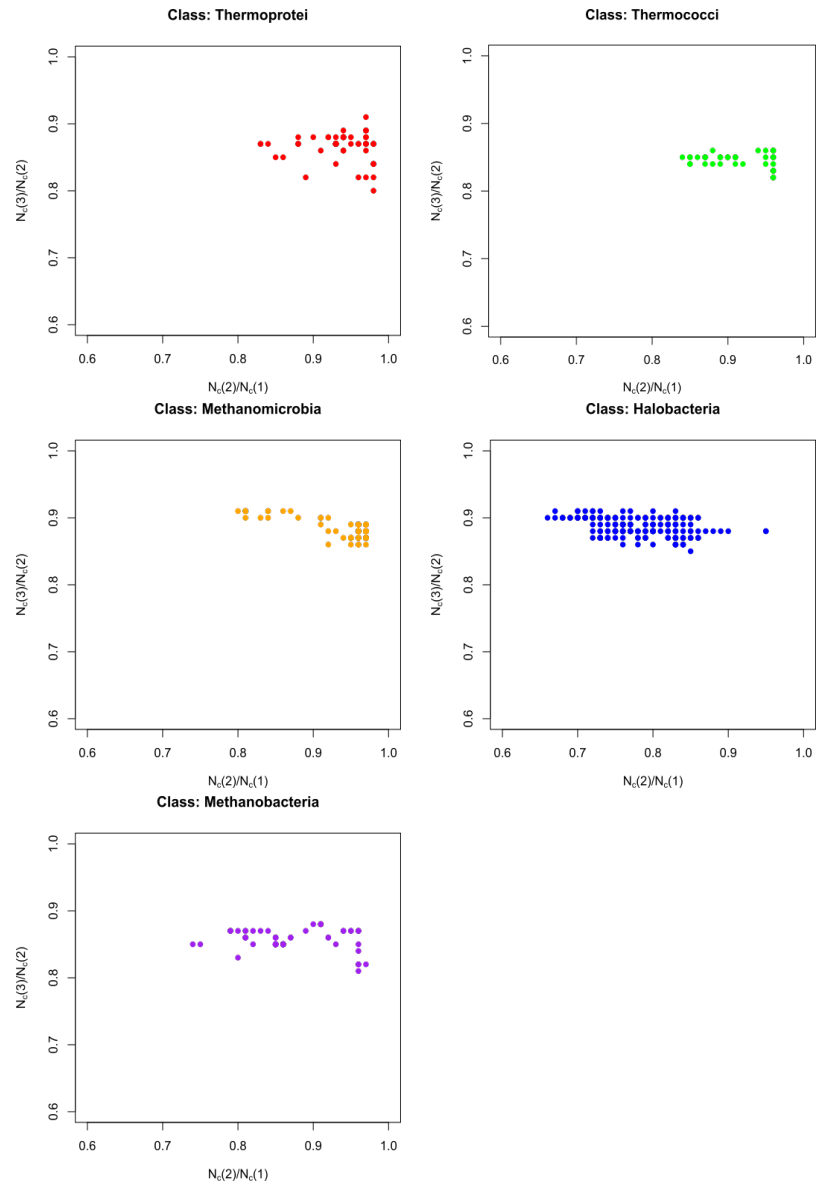

**Fig 8.** Ratios  $N_c(2)/N_c(1)$  and  $N_c(3)/N_c(2)$  across the Archaea classes of Thermoprotei ( $N = 71$ ), Thermococci ( $N = 44$ ), Methanomicrobia ( $N = 85$ ), Halobacteria ( $N = 208$ ), and Methanobacteria ( $N = 67$ ).  $N$  designates the number of distinct taxon IDs.

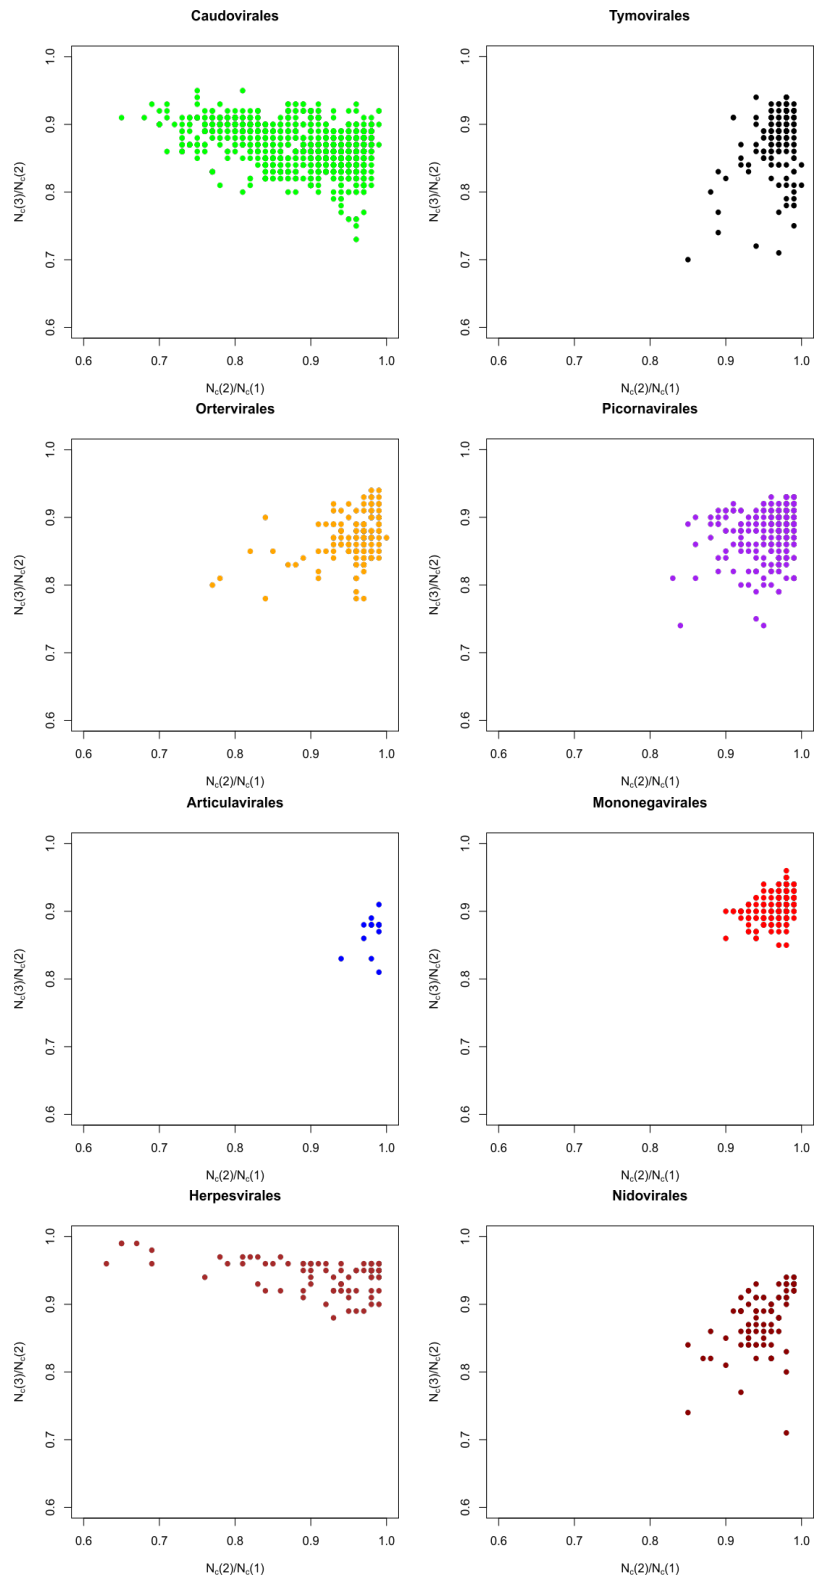

**Fig 9.** Ratios  $N_c(2)/N_c(1)$  and  $N_c(3)/N_c(2)$  across the virus classes Caudovirales ( $N = 2,049$ ), Tymovirales ( $N = 190$ ), Ortervirales ( $N = 134$ ), Picornavirales ( $N = 282$ ), Articulavirales ( $N = 15$ ), Mononegavirales ( $N = 246$ ), Herpesvirales ( $N = 69$ ), and Nidovirales ( $N = 86$ ).  $N$  designates the number of distinct taxon IDs.



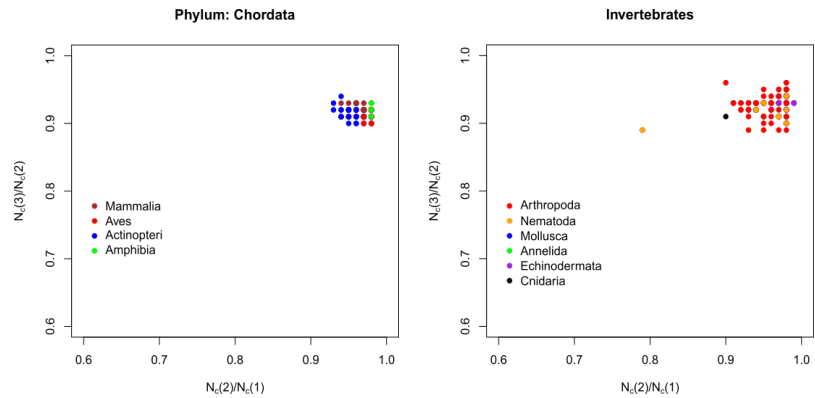

**Fig 10.** Ratios  $N_c(2)/N_c(1)$  and  $N_c(3)/N_c(2)$  across the Phylum Chordata (Mammalia ( $N = 115$ ), Aves ( $N = 62$ ), Actinopteri ( $N = 50$ ), Amphibia ( $N = 3$ )) and various phyla of invertebrates (Arthropoda ( $N = 126$ ), Nematoda ( $N = 8$ ), Mollusca ( $N = 8$ ), Annelida ( $N = 1$ ), Echinodermata ( $N = 2$ ), Cnidaria ( $N = 6$ )).  $N$  designates the number of distinct taxon IDs.

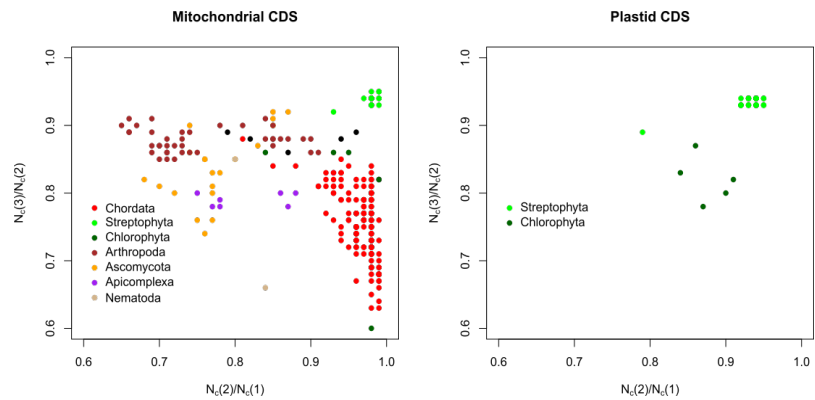

**Fig 11.** Ratios  $N_c(2)/N_c(1)$  and  $N_c(3)/N_c(2)$  for mitochondria (Chordata ( $N = 164$ ), Streptophyta ( $N = 25$ ), Chlorophyta ( $N = 5$ ), Arthropoda ( $N = 40$ ), Ascomycota ( $N = 20$ ), Apicomplexa ( $N = 8$ ), Nematoda ( $N = 2$ )) and chloroplasts (Streptophyta ( $N = 57$ ) and Chlorophyta ( $N = 5$ )).  $N$  designates the number of distinct taxon IDs.

## 1.6 Using $N_c(1)$ , $N_c(2)$ , and $N_c(3)$ to understand codon usage bias within organisms

The techniques described above can also be used to analyze the codon usage bias across different CDS within a single organism's genome. The techniques of analysis are basically the same, however, in order to restrict the analyses to those CDS which are least likely to have skewed codon bias due to a short sequence length, the organisms presented here are analyzed using only those CDS which contain at least 200 codons. The results shown in Fig 12 are consistent and different from the analysis across organisms. For one, while mutational biases, represented in the decrease of the ratio  $N_c(2)/N_c(1)$  seem dominant in the variation codon usage biases across organisms, bias in codon usage due to selection of specific codons, represented by  $N_c(3)/N_c(2)$  seems to dominate the variation of codon usage bias within genomes. This may not be unexpected since within a single organism, processes that create mutational biases are likely rather uniform while genes that require high expression are more likely to have biases in the content of their codons in order to maximize efficiency.

Like variation across organisms, simpler organisms such as bacteria, yeast, or protozoa seem to manifest more variation within the genome while complex multicellular organisms show such variation in a more restricted range.

## Discussion

The methods and results in this paper formalize the distinction of the forces operating on codon usage bias at all levels. While two of the metrics  $N_c(2)$  and  $N_c(3)$  closely approximate earlier metrics from [14] for  $N_c$  assuming only mutation and  $N_c$  overall, they possess some distinct advantages. First,  $N_c(2)$  directly incorporates GC content at all three sites though GC(3) is usually decisive. This can give more accurate results when GC(3) is extremely skewed high or low and the approximation in Eq. 15 overestimates the effective codon number. While similar to  $N_c$ ,  $N_c(3)$  is much easier to calculate requiring only the frequency of each codon and the number of stop codons. The knowledge of the number of degenerate codons per amino acid and adjustments for situations where  $N_c$  needs to account for unused or heavily skewed codon usages are unnecessary. The measure  $N_c(1)$  is the first measure to genuinely give a base random case for codons incorporating GC content and not requiring the assumption of equal usage.

The new metrics also allow for tentative testing of the likelihood codon usage in organisms or genes is driven by GC content, mutation, or selection. A traditional  $\chi^2$  analysis of  $N_c$  or  $N_c(3)$  against expected values of  $N_c(1)$  and  $N_c(2)$  can point out whether groups of genes use codons in a way that would be expected if GC content or mutational biases were the drivers of the effective codon number.

In addition, the ratios of  $N_c(2)/N_c(1)$  and  $N_c(3)/N_c(2)$  demonstrate for single organisms or genes which forces are relatively more prominent in reducing the effective codon number from its theoretical maximum. Comparing across organisms and within genomes as shown in the figures seems to show a pertinent pattern despite a few exceptions. First, the differences amongst organisms can be wide but large variations are more often driven by different mutational biases and G+C in genomes as shown by  $N_c(2)/N_c(1)$  instead of widely different levels of genome wide codon selection as shown by  $N_c(3)/N_c(2)$ . This is especially true in unicellular organisms though some groups of viruses show widely different selection pressures on codon usage. On the other hand large variations in codon usage bias amongst genes within organisms seem driven by selection which is consistent with the observation codon usage bias often varies with genes based on frequency of expression.

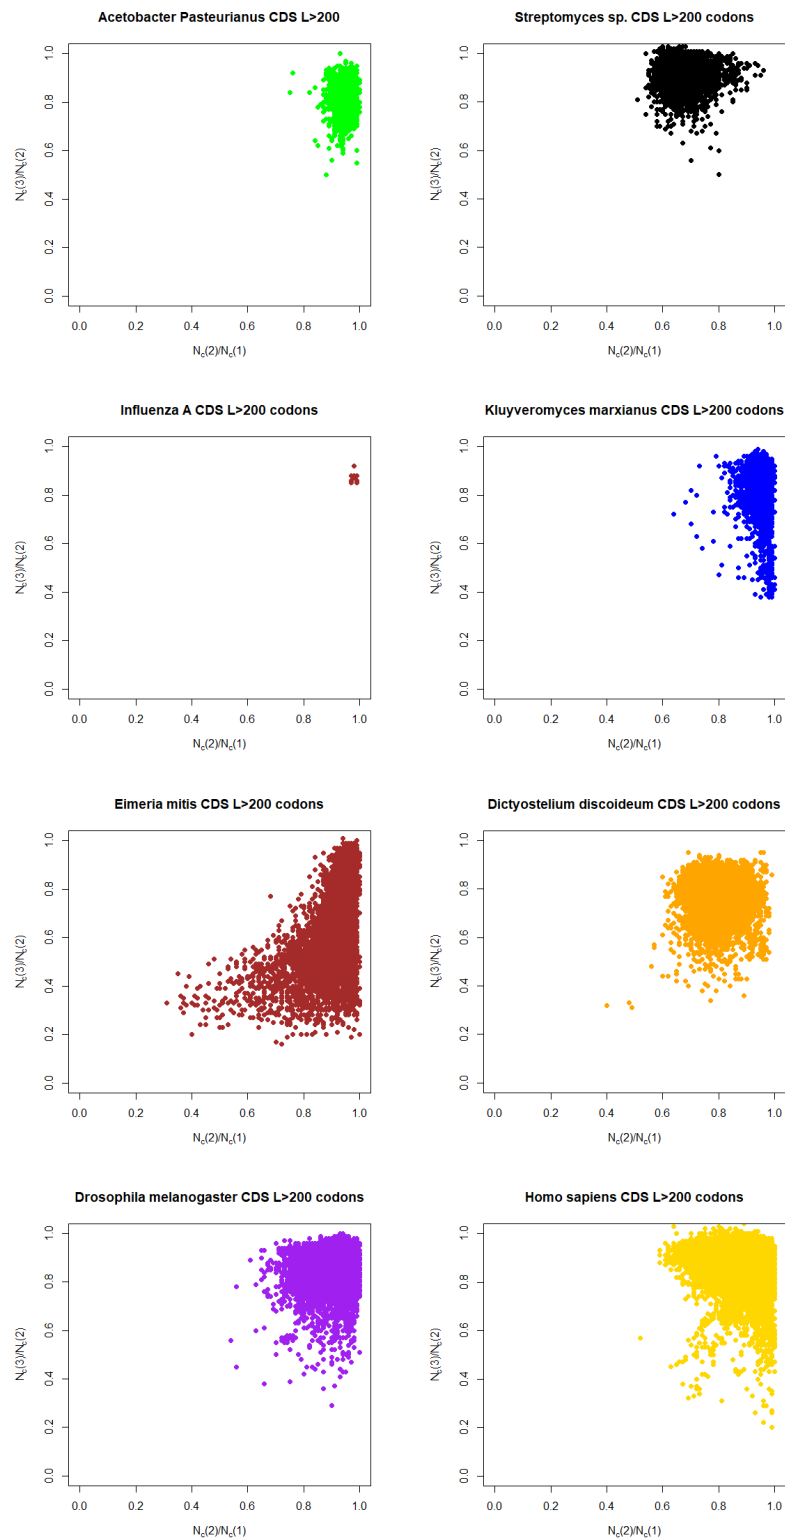

**Fig 12.** Ratios  $N_c(2)/N_c(1)$  and  $N_c(3)/N_c(2)$  within the CDS of various organisms. (A) *A. pasteurianus*  $N = 1,905$ , (B) *Streptomyces sp. CNT-302*  $N = 4,248$ , (C) *Influenza A*  $N = 9$ , (D) *K. marxianus*  $N = 4,205$ , (E) *E. mitis*  $N = 6,114$ , (F) *D. discoideum*  $N = 9,937$ , (G) *D. melanogaster*  $N = 25,236$ , and (H) *H. sapiens*  $N = 105,072$ .

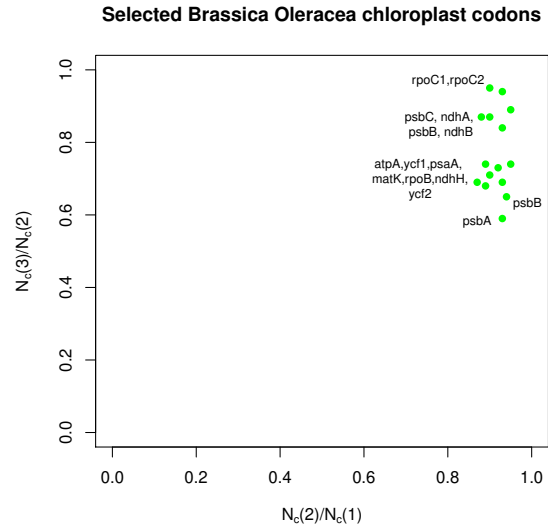

**Fig 13.** Scatterplot of  $N_c(3)/N_c(2)$  versus  $N_c(2)/N_c(1)$  for selected chloroplast genes in *Brassica oleracea* isolate RC34 Genbank MG717288.1.

Many of the results at the organism or gene level also corroborate previous theories about the roles of various evolutionary forces on codon usage bias. As stated earlier, *Streptomyces sp.* shows codon usage largely shaped by mutation [38] with relatively muted influence of selection both at the whole chromosome as well as the CDS level. On the other hand, the codons in the Influenza virus show little influence of mutation but the definite marks of selection [39] with one of the highest  $N_c(3)/N_c(2)$  being the codons of the surface protein hemagglutinin with a  $N_c(2)/N_c(1)$  of 0.97 and  $N_c(3)/N_c(2)$  of 0.85.

Another closely corresponding result for within genome comparison is the codon bias of plant chloroplast genes. In particular, Morton and others [40–42] have noted the atypical codon bias of *psbA* and how it may have been shaped by selective forces though such forces are possibly ancestral and now relaxed [42]. The relative ranking of other genes also closely matches those found by CAI in [41]. A plot of these genes is shown in Fig 13

Comparing genes within organisms, where mutational biases are relatively constant, shows that selection, driven by various efficiencies or adaptations, drives most of the differentiation in codon usage bias. Therefore it seems broadly that the values of  $N_c(2)/N_c(1)$  show wider variation among organisms and  $N_c(3)/N_c(2)$  show wider variation within organisms.

## Conclusion

The overall theory underlying the methods in this paper is that each force biasing codon usage, from the genome level to the mutational and selective processes, drives a reduction in the effective codon size from its theoretical maximum of 61 to the final value of  $N_c$ . Analyzing each of these separately is possible using information theoretic methods applied to combinatorics without making unreasonable or unrealistic assumptions about the underlying genetic mechanisms. The relative amount of reduction in the effective codon number between each analysis is a generalizable and comparable across or within organisms to investigate the causes of codon usage bias

despite differences in genome G+C content or codon site G+C content. 392

Finally, by allowing the causes of codon usage bias to be compared across wide 393  
groups of organisms, a consistent study of the causes of codon bias compared across 394  
phylogenetic trees can perhaps give more clues to evolutionary processes and relations 395  
amongst organisms. As always, detailed work at the organism level is essential to 396  
unveiling the details which may corroborate or contradict the root causes of the forces 397  
affecting codon bias. 398

## Acknowledgments 399

I would like to thank Dr. Hiroyuki Arai for helpful data on *A. Pasteurianus*. 400

## References

1. Crick, FHC The origin of the genetic code. *J. Mol. Biol.* 1968 38(3):367-379.
2. Clarke, B Darwinian evolution of proteins. *Science.* 1970 168:1009–1011.
3. Post, LE, Nomura, M DNA sequences from the str operon of *Escherichia coli*. *J. Biol. Chem.* 1980 255:4660–4665.
4. Grantham, R, Gautier, C, Guoy, M, Mercier, R, Pave, A Codon catalog usage and the genome hypothesis. *Nucleic Acids Res.* 1980 8:r49–r62.
5. Ikemura, T Codon usage and tRNA content in unicellular and multicellular organisms. *Mol. Biol. Evol.* 1985 2(1):13-34.
6. Sharp, PM, Tuohy, TM, Mosurski, KR Codon usage in yeast: cluster analysis clearly differentiates highly and lowly expressed genes. *Nucleic Acids Res.* 1986 14(13):5125-5143.
7. Akashi, H Synonymous codon usage in *Drosophila melanogaster*: natural selection and translational accuracy. *Genetics.* 1994 136(3):927-935.
8. Gustafsson, C, Govindarajan, S, Minshull, J Codon bias and heterologous protein expression. *Trends Biotechnol.* 2004 22(7):346-353.
9. Reis, MD, Savva, R, Wernisch, L Solving the riddle of codon usage preferences: a test for translational selection. *Nucleic Acids Res.* 2004 32(17):5036-5044.
10. Bulmer, M. The selection-mutation-drift theory of synonymous codon usage. *Genetics.* 1991 129(3):897-907.
11. Bulmer, M. Are codon usage patterns in unicellular organisms determined by selection-mutation balance? *J. Evol. Biol.* 1988 1(1):15-26.
12. Karlin, S, Mrázek, J What drives codon choices in human genes? *J. Mol. Biol.* 1996 262(4):459-472.
13. Sharp, PM, Li, WH (1987). The codon adaptation index—a measure of directional synonymous codon usage bias, and its potential applications. *Nucleic Acids Res.* 1987 15(3):1281-1295.
14. Wright, F The ‘effective number of codons’ used in a gene. *Gene.* 1990. 87(1):23-29.

15. Fuglsang, A The 'effective number of codons' revisited. *Biochem Biophys Res Commun.* 2004 317(3):957-964.
16. Novembre JA 2002 Accounting for background nucleotide composition when measuring codon usage bias. *Mol. Biol. Evol.* 2002 19:1390–1394.
17. Fuglsang, A Accounting for background nucleotide composition when measuring codon usage bias: brilliant idea, difficult in practice. *Mol. Biol. Evol.* 2006 23(7):1345-1347.
18. Sun, X, Yang, Q, Xia, X An improved implementation of effective Number of Codons ( $N_c$ ). *Mol. Biol. Evol.* 2012 30(1):191-196.
19. Tavare, S, Song, B Codon preference and primary sequence structure in protein-coding regions. *Bull. Math. Biol.* 1989 51(1):95-115.
20. Zeeberg, B Shannon information theoretic computation of synonymous codon usage biases in coding regions of human and mouse genomes. *Genome Res.* 2002 12(6):944-955.
21. Wan, X, Xu, D, Zhou, J A new informatics method for measuring synonymous codon usage bias. *Intelligent engineering systems through artificial neural networks.* 2003 13.
22. Suzuki, H, Saito, R, Tomita, M The 'weighted sum of relative entropy': a new index for synonymous codon usage bias. *Gene.* 2004 335:19-23.
23. Comerón, JM, Aguadé, M An evaluation of measures of synonymous codon usage bias. *J. Mol. Evol.* 1998 47(3):268-274.
24. Liu, SS, Hockenberry, AJ, Jewett, MC, Amaral, LA A novel framework for evaluating the performance of codon usage bias metrics. *J. R. Soc. Interface.* 2018 15(138):20170667.
25. Peng, C.K., Buldyrev, S.V., Goldberger, A.L., Havlin, S., Sciortino, F., Simons, M., Stanley, H.E. Long-range correlations in nucleotide sequences. *Nature.* 1992 356(6365):168-170.
26. Shannon, CE, Weaver, W The mathematical theory of communication. London: Urbana: University of Illinois Press.; 1959.
27. Wan, XF, Xu, D, Kleinhofs, A, Zhou, JZ Quantitative relationship between synonymous codon usage bias and GC composition across unicellular genomes. *BMC Evol. Biol.* 2004 4(1):19.
28. Gzyl, H. The method of maximum entropy. Vol. 29. Singapore: World scientific.; 1995.
29. Li, J, Zhou, J, Wu, Y, Yang, S, Tian, D GC-content of synonymous codons profoundly influences amino acid usage. *G3.* 2015 5(10):2027-2036.
30. Sueoka, N. Directional mutation pressure and neutral molecular evolution. *Proc. Natl. Acad. Sci. U.S.A.* 1988 85(8):2653-2657.
31. Hershberg, R, Petrov, DA Selection on codon bias. *Annu. Rev. Genet.* 2008 42:287-299.
32. Palidwor, Gareth A., Theodore J. Perkins, and Xuhua Xia. A general model of codon bias due to GC mutational bias. *PLoS One* 2010 5(10):e13431.

33. Athey, J., Alexaki, A., Osipova, E., et. al. A new and updated resource for codon usage tables. *BMC Bioinformatics*. 2017 18(1):391.
34. Jost L. Entropy and diversity. *Oikos* 2006 113(2):363-75.
35. Miller, G.A. Note on the bias of information estimates. In: Quastler, H editor. *Information theory in psychology: problems and methods* Glencoe: Free Press; 1955. p. 95-100.
36. Panzeri, S., Treves, A. Analytical estimates of limited sampling biases in different information measures. *Network*. 1996 7:87–107.
37. Smith R. A mutual information approach to calculating nonlinearity. *Stat*. 2015 4(1):291-303.
38. Wright, F., Bibb, M. J. Codon usage in the G+C-rich *Streptomyces* genome. *Gene*. 1992 113(1):55–65.
39. Plotkin JB, Dushoff J. Codon bias and frequency-dependent selection on the hemagglutinin epitopes of influenza A virus. *Proc. Natl. Acad. Sci. U.S.A.* 2003 100(12):7152-7157.
40. Morton BR Chloroplast DNA codon use: evidence for selection at the psb A locus based on tRNA availability. *J. Mol. Evol.* 1993 37(3):273-80.
41. Morton BR Codon use and the rate of divergence of land plant chloroplast genes. *Mol. Biol. Evol.* 1994 11(2):231-8.
42. Morton BR, Levin JA The atypical codon usage of the plant psbA gene may be the remnant of an ancestral bias. *Proc. Natl. Acad. Sci. U.S.A.* 1997 94(21):11434-8.
